# Supplementary material for: A kinetics and mechanistic study on the role of the structural rigidity of the linker on the substitution reactions of chelated dinuclear Pt(ii) complexes
Source: Royal Society of Chemistry journal article supplement (doi:10.1039/c1dt11516b), 2011-11-17
Supplement: c1dt11516b.pdf [file c1dt11516b.pdf]

**Electronic Supplementary Information**

**A kinetics and Mechanistic study on the role of the structural rigidity of the linker on the substitution reactions of chelated dinuclear Pt(II) complexes.**

**Allen Mambanda and Deogratius Jaganyi\***

**School of Chemistry, University of KwaZulu-Natal, Scottsville, 3209, South Africa.**

**Table SI 1** Summary of the wavelengths (nm) used for monitoring the reactions between a series of Pt(II) complexes with bis(2-pyridylmethyl)amine chelates and thiourea nucleophiles.

| <b>Complex</b> | <b>nu</b> | <b>Wavelength (<math>\lambda</math>), nm</b> |
|----------------|-----------|----------------------------------------------|
| <b>bpPha</b>   | tu        | 310                                          |
|                | dmtu      | 286                                          |
|                | tmtu      | 312                                          |
| <b>mPh</b>     | tu        | 312                                          |
|                | dmtu      | 325                                          |
|                | tmtu      | 335                                          |
| <b>pPh</b>     | tu        | 315                                          |
|                | dmtu      | 325                                          |
|                | tmtu      | 330                                          |
| <b>dPhm</b>    | tu        | 315                                          |
|                | dmtu      | 318                                          |
|                | tmtu      | 335                                          |
| <b>bpcHna</b>  | tu        | 283                                          |
|                | dmtu      | 284                                          |
|                | tmtu      | 315                                          |
| <b>cHn</b>     | tu        | 324                                          |
|                | dmtu      | 325                                          |
|                | tmtu      | 318                                          |
| <b>dcHnm</b>   | tu        | 325                                          |
|                | dmtu      | 325                                          |
|                | tmtu      | 327                                          |

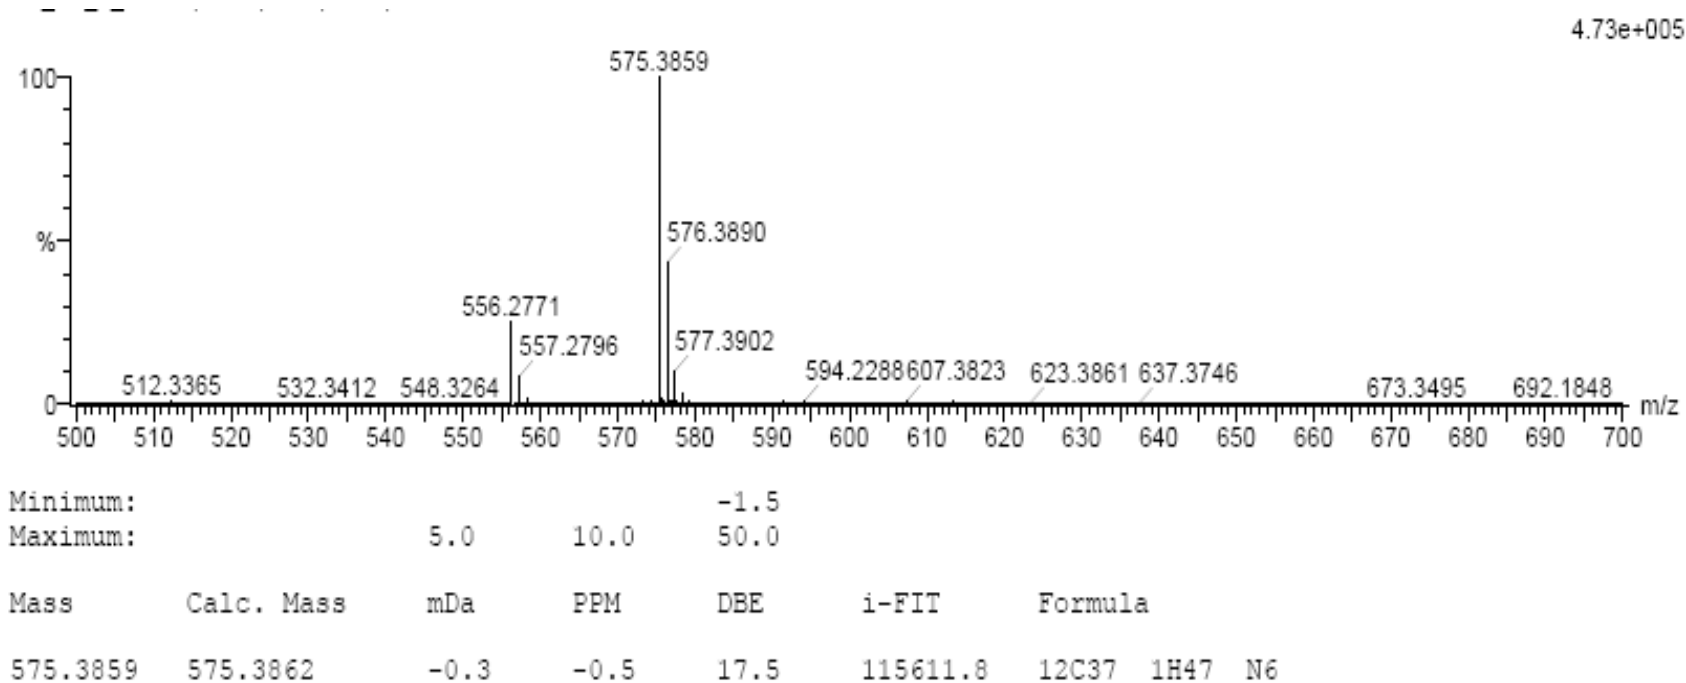

**Figure SI 1a** Mass spectrum (TOF-MS<sup>+</sup>) for *N,N,N',N'*-tetrakis(2-pyridylmethyl)-4,4'-diclohexylmethanediamine (**L3**).

AM\_dPhm 10 (0.338) Cm (2:28)

TOF MS ES+  
3.98e+006

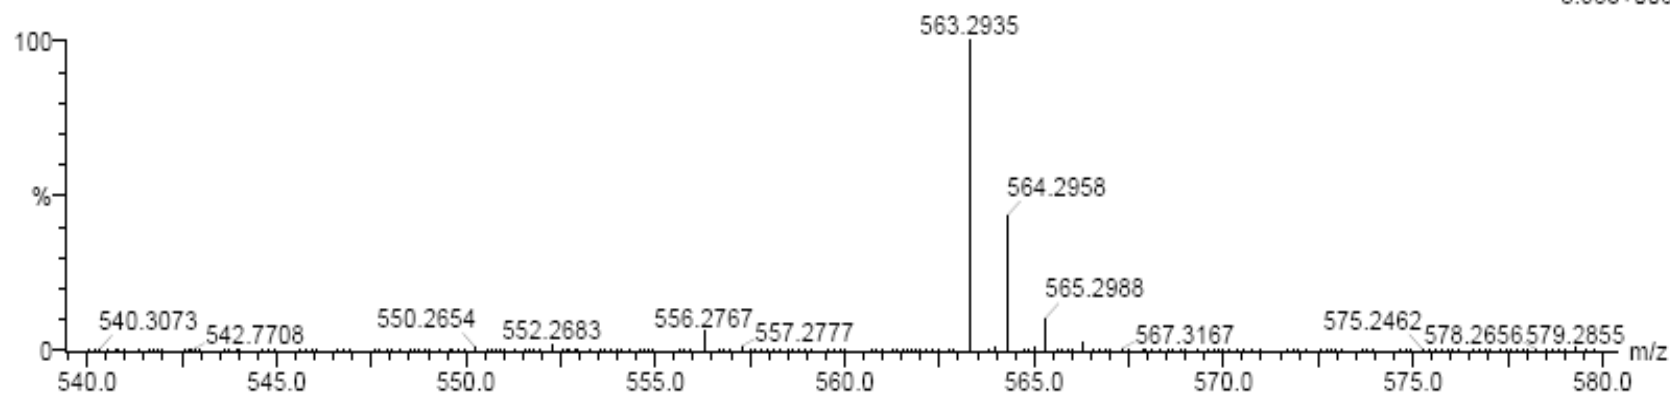

Minimum: -1.5  
Maximum: 5.0 10.0 50.0

| Mass     | Calc. Mass | mDa  | PPM  | DBE  | i-FIT | Formula          |
|----------|------------|------|------|------|-------|------------------|
| 563.2935 | 563.2923   | 1.2  | 2.1  | 23.5 | 51.8  | 12C37 1H35 14N6  |
|          | 563.2906   | 2.9  | 5.1  | 10.5 | 298.5 | 12C3 1H23 14N36  |
|          | 563.2973   | -3.8 | -6.7 | 13.5 | 530.6 | 12C12 1H27 14N28 |

**Figure SI 1b** Mass spectrum (TOF-MS<sup>+</sup>) for *N,N,N',N'*-tetrakis(2-pyridylmethyl)-4,4'-diphenylmethanediamine (**L7**).

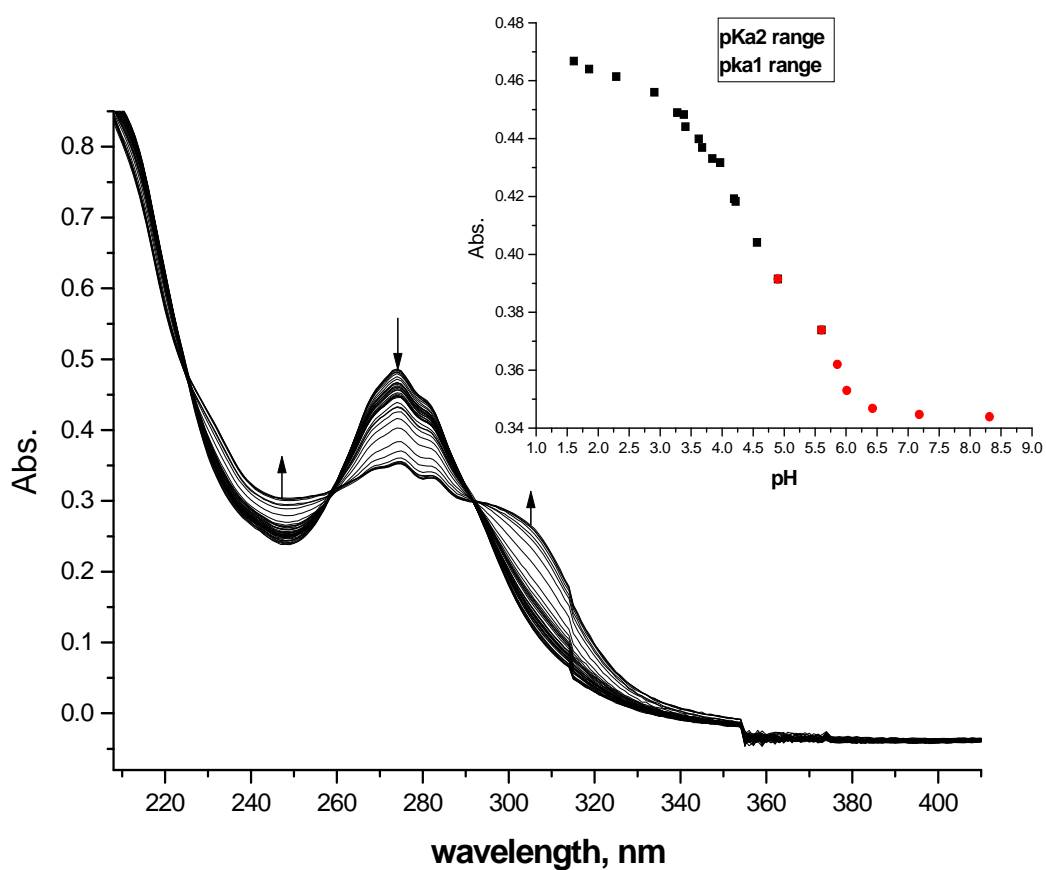

**Figure SI 2** UV-visible spectra for the titration of 0.11 mM **dcHnm** with NaOH, pH range 2-9, T = 298K. Inset is the titration curve at 268 nm.

**Table SI 2a** Average observed rate constants,  $k_{\text{obs},(1)^{\text{st}}}$ ,  $\text{s}^{-1}$ , for the simultaneous displacement of the aqua ligands in **bpcHna** by thiourea nucleophiles, pH = 2.0, T = 298 K, I = 0.02 M {0.01 M  $\text{CF}_3\text{SO}_3\text{H}$ , adjusted with  $\text{Li}(\text{SO}_3\text{CF}_3)$ }.

| [tu], M | $k_{\text{obs},1}, \text{s}^{-1}$ | [dm tu], M | $k_{\text{obs},1}, \text{s}^{-1}$ | [tmtu], M | $k_{\text{obs},1}, \text{s}^{-1}$ |
|---------|-----------------------------------|------------|-----------------------------------|-----------|-----------------------------------|
| 5.33E-4 | 0.4819                            | 5.33E-4    | 0.5256                            | 5.34E-4   | 0.1166                            |
| 0.0011  | 1.018                             | 0.0011     | 1.081                             | 0.0011    | 0.228                             |
| 0.0016  | 1.525                             | 0.0016     | 1.616                             | 0.0016    | 0.3343                            |
| 0.0021  | 2.012                             | 0.0021     | 2.194                             | 0.0021    | 0.4503                            |
| 0.0027  | 2.496                             | 0.0027     | 2.779                             | 0.0027    | 0.5506                            |

**Table SI 2b** Average observed rate constants,  $k_{\text{obs},(2)^{\text{nd}}}$ ,  $\text{s}^{-1}$ , for the dechelation of the pyridyl units in **bpcHna** by thiourea nucleophiles, pH = 2.0, T = 298 K, I = 0.02 M {0.01 M  $\text{CF}_3\text{SO}_3\text{H}$ , adjusted with  $\text{Li}(\text{SO}_3\text{CF}_3)$ }.

| [tu], M | $k_{\text{obs},2}, \text{s}^{-1}$ | [dm tu], M | $k_{\text{obs},2}, \text{s}^{-1}$ | [tmtu], M | $k_{\text{obs},2}, \text{s}^{-1}$ |
|---------|-----------------------------------|------------|-----------------------------------|-----------|-----------------------------------|
| 5.33E-4 | 0.00409                           | 5.3E-4     | 0.0048                            | 5.33E-4   | 0.00128                           |
| 0.0011  | 0.00794                           | 0.0011     | 0.0095                            | 0.0011    | 0.00216                           |
| 0.0016  | 0.01064                           | 0.0016     | 0.0147                            | 0.0016    | 0.00374                           |
| 0.0021  | 0.01464                           | 0.0021     | 0.0198                            | 0.0021    | 0.0046                            |
| 0.0027  | 0.01864                           | 0.0027     | 0.0266                            | 0.0027    | 0.00573                           |

**Table SI 2c** Temperature dependence of  $k_{2(1)^{\text{st}}}$ ,  $\text{M}^{-1} \text{s}^{-1}$ , for the simultaneous displacement of the aqua ligands in **bpcHna** by thiourea nucleophiles, pH = 2.0, I = 0.02 M (0.01 M  $\text{CF}_3\text{SO}_3\text{H}$ , adjusted with  $\text{Li}(\text{SO}_3\text{CF}_3)$ ).

| 1/T, $\text{K}^{-1}$ | $\ln(k/T)$ | 1/T, $\text{K}^{-1}$ | $\ln(k/T)$ | 1/T, $\text{K}^{-1}$ | $\ln(k/T)$ |
|----------------------|------------|----------------------|------------|----------------------|------------|
| 0.00325              | 1.654      | 0.00325              | 1.758      | 0.00325              | 0.1939     |
| 0.0033               | 1.412      | 0.0033               | 1.502      | 0.0033               | -0.07      |
| 0.00335              | 1.204      | 0.00335              | 1.253      | 0.00335              | -0.368     |
| 0.00341              | 0.9062     | 0.00341              | 0.9781     | 0.00341              | -0.608     |
| 0.00347              | 0.6515     | 0.00347              | 0.6894     | 0.00347              | -0.974     |

**Table SI 2d** Temperature dependence of  $k_{2(2)^{\text{nd}}}$ ,  $\text{M}^{-1} \text{s}^{-1}$ , for the dechelation of the pyridyl units in **bpcHna** by thiourea nucleophiles, pH = 2.0, I = 0.02 M (0.01 M  $\text{CF}_3\text{SO}_3\text{H}$ , adjusted with  $\text{Li}(\text{SO}_3\text{CF}_3)$ ).

| 1/T, $\text{K}^{-1}$ | $\ln(k/T)$ | 1/T, $\text{K}^{-1}$ | $\ln(k/T)$ | 1/T, $\text{K}^{-1}$ | $\ln(k/T)$ |
|----------------------|------------|----------------------|------------|----------------------|------------|
| 0.00325              | -3.142     | 0.00325              | -3.013     | 0.00325              | -4.258     |
| 0.0033               | -3.364     | 0.0033               | -3.294     | 0.0033               | -4.563     |
| 0.00335              | -3.658     | 0.00335              | -3.498     | 0.00335              | -4.898     |
| 0.00341              | -4.002     | 0.00341              | -3.858     | 0.00341              | -5.281     |
| 0.00347              | -4.231     | 0.00347              | -4.217     | 0.00347              | -5.675     |

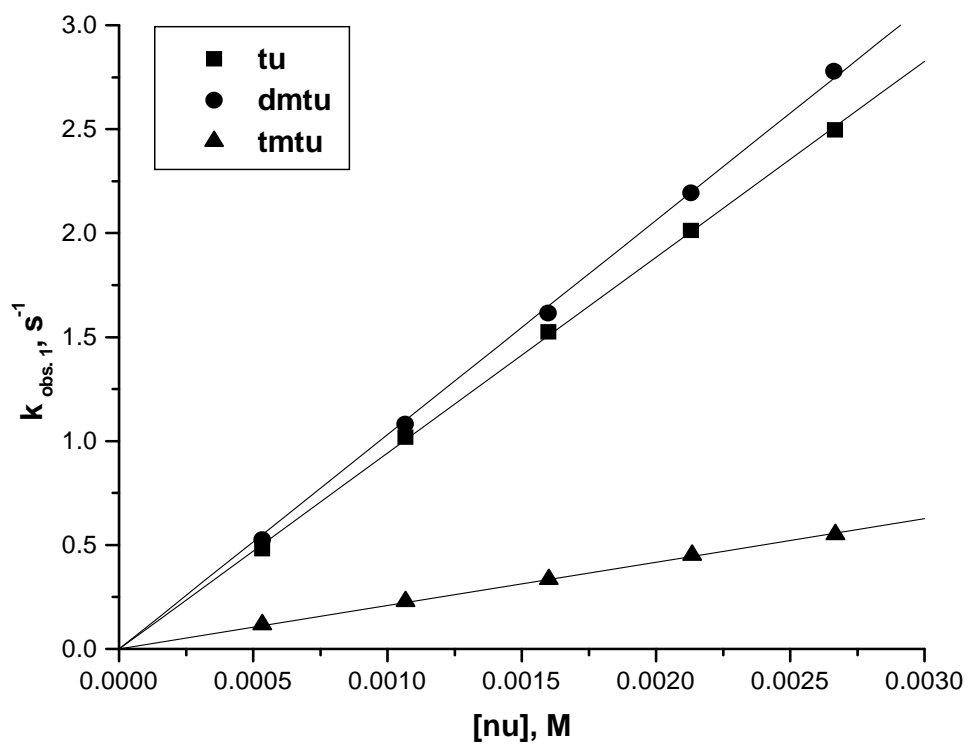

**Figure SI 3a** Concentration dependence of  $k_{\text{obs.}(1)}^{\text{st}}$ ,  $\text{s}^{-1}$ , for the simultaneous displacement of the aqua ligands in **bpcHna** by thiourea nucleophiles, pH = 2.0, T = 298 K, I = 0.02 M {0.01 M  $\text{CF}_3\text{SO}_3\text{H}$ , adjusted with  $\text{Li}(\text{SO}_3\text{CF}_3)$ }.

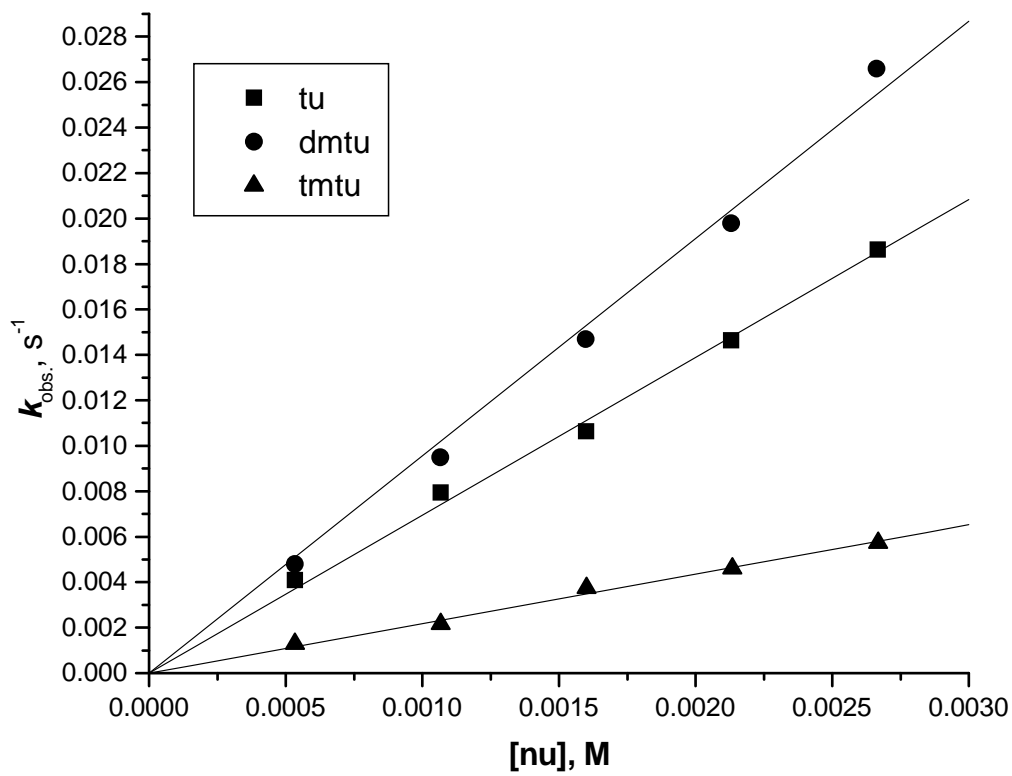

**Figure SI 3b** Concentration dependence of  $k_{\text{obs},(2)}^{\text{nd}}$ ,  $\text{s}^{-1}$ , for the dechelation of the pyridyl units in **bpcHna** by thiourea, pH = 2.0, T = 298 K, I = 0.02 M {0.01 M  $\text{CF}_3\text{SO}_3\text{H}$ , adjusted with  $\text{Li}(\text{SO}_3\text{CF}_3)$ }.

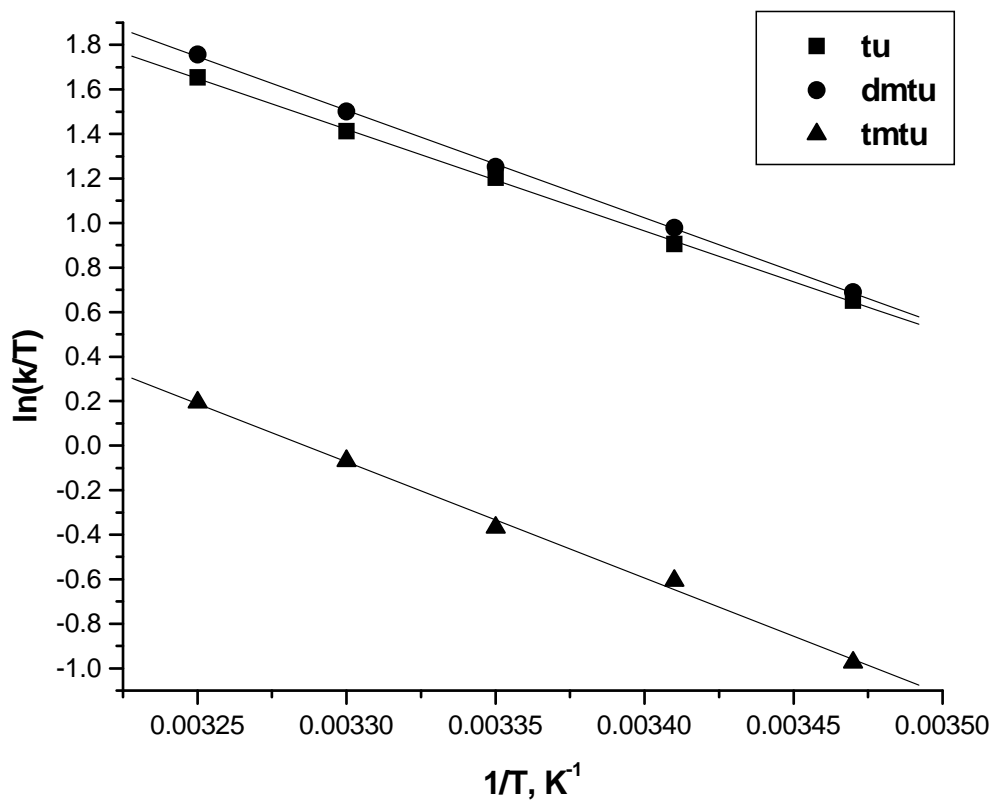

**Figure SI 4a** Temperature dependence of  $k_{2(1)}^{st}, M^{-1} s^{-1}$ , for the simultaneous displacement of the first aqua ligand in **bpcHna** by thiourea nucleophiles, pH = 2.0, I = 0.02 M (0.01 M  $CF_3SO_3H$ , adjusted with  $Li(SO_3CF_3)$ ).



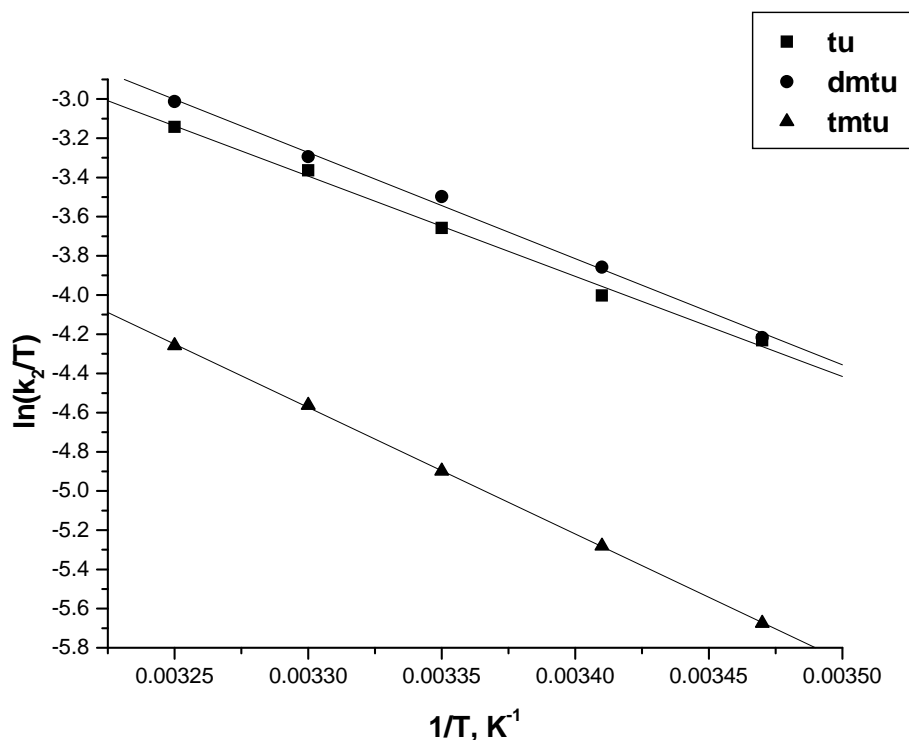

**Figure SI 4b** Temperature dependence of  $k_{2(2^{nd})}$ ,  $M^{-1} s^{-1}$ , for the dechelation of the pyridyl units in **bpcHna** by thiourea, pH = 2.0, I = 0.02 M (0.01 M  $CF_3SO_3H$ , adjusted with  $Li(SO_3CF_3)$ ).

**Table SI 3a** Average observed rate constants,  $k_{obs,(1)^{st}}$ ,  $s^{-1}$ , for the simultaneous displacement of the aqua ligands in **dcHnm** by thiourea nucleophiles, pH = 2.0, T = 298 K, I = 0.02 M {0.01 M  $CF_3SO_3H$ , adjusted with  $Li(SO_3CF_3)$ }.

| [tu], M | $k_{obs,1}, s^{-1}$ | [dmtu], M | $k_{obs,1}, s^{-1}$ | [tmtu], M | $k_{obs,1}, s^{-1}$ |
|---------|---------------------|-----------|---------------------|-----------|---------------------|
| 0.00106 | 0.821               | 0.00107   | 0.9916              | 0.00107   | 0.224               |
| 0.00213 | 1.637               | 0.00213   | 1.983               | 0.00213   | 0.4554              |
| 0.00319 | 2.439               | 0.0032    | 2.965               | 0.0032    | 0.6678              |
| 0.00426 | 3.279               | 0.00426   | 4.001               | 0.00426   | 0.8921              |
| 0.00532 | 4.155               | 0.00533   | 5.016               | 0.00533   | 1.135               |

**Table SI 3b** Average observed rate constants,  $k_{\text{obs.}(2^{\text{nd}})}$ ,  $\text{s}^{-1}$ , for the dechelation of the pyridyl units in **dcHnm** by thiourea nucleophiles,  $\text{pH} = 2.0$ ,  $T = 298 \text{ K}$ ,  $I = 0.02 \text{ M}$   $\{0.01 \text{ M CF}_3\text{SO}_3\text{H}$ , adjusted with  $\text{Li}(\text{SO}_3\text{CF}_3)\}$ .

| [tu], M | $k_{\text{obs } 1}, \text{s}^{-1}$ | [dmtu], M | $k_{\text{obs } 1}, \text{s}^{-1}$ | [tmtu], M | $k_{\text{obs } 1}, \text{s}^{-1}$ |
|---------|------------------------------------|-----------|------------------------------------|-----------|------------------------------------|
| 0.00107 | 0.00826                            | 0.00107   | 0.00925                            | 0.00107   | 0.00259                            |
| 0.00214 | 0.0176                             | 0.00214   | 0.01971                            | 0.00214   | 0.00551                            |
| 0.0032  | 0.0249                             | 0.0032    | 0.02789                            | 0.0032    | 0.0078                             |
| 0.00426 | 0.0325                             | 0.00426   | 0.0364                             | 0.00426   | 0.01017                            |
| 0.00532 | 0.0413                             | 0.00532   | 0.04626                            | 0.00532   | 0.01293                            |

**Table SI 3c** Temperature dependence of  $k_{2(1^{\text{st}})}$ ,  $\text{M}^{-1} \text{s}^{-1}$ , for the simultaneous displacement of the aqua ligands in **dcHnm** by thiourea nucleophiles,  $\text{pH} = 2.0$ ,  $I = 0.02 \text{ M}$  (0.01 M  $\text{CF}_3\text{SO}_3\text{H}$ , adjusted with  $\text{Li}(\text{SO}_3\text{CF}_3)$ ).

| $1/T, \text{K}^{-1}$ | $\ln(k/T)$ | $1/T, \text{K}^{-1}$ | $\ln(k/T)$ | $1/T, \text{K}^{-1}$ | $\ln(k/T)$ |
|----------------------|------------|----------------------|------------|----------------------|------------|
| 0.00325              | 1.452      | 0.00325              | 1.604      | 0.00325              | 0.2837     |
| 0.0033               | 1.203      | 0.0033               | 1.4265     | 0.0033               | -0.0318    |
| 0.00335              | 0.963      | 0.00335              | 1.149      | 0.00335              | -0.3366    |
| 0.00341              | 0.7257     | 0.00341              | 0.8833     | 0.00341              | -0.6413    |
| 0.00347              | 0.4208     | 0.00347              | 0.5258     | 0.00347              | -0.9573    |

**Table SI 3d** Temperature dependence of  $k_{2(2^{\text{nd}})}$ ,  $\text{M}^{-1} \text{s}^{-1}$ , for the dechelation of the pyridyl units in **dcHnm** by thiourea nucleophiles,  $\text{pH} = 2.0$ ,  $I = 0.02 \text{ M}$  (0.01 M  $\text{CF}_3\text{SO}_3\text{H}$ , adjusted with  $\text{Li}(\text{SO}_3\text{CF}_3)$ ).

| $1/T, \text{K}^{-1}$ | $\ln(k/T)$ | $1/T, \text{K}^{-1}$ | $\ln(k/T)$ | $1/T, \text{K}^{-1}$ | $\ln(k/T)$ |
|----------------------|------------|----------------------|------------|----------------------|------------|
| 0.00325              | -3.078     | 0.00325              | -3.005     | 0.00325              | -4.104     |
| 0.0033               | -3.356     | 0.0033               | -3.264     | 0.0033               | -4.449     |
| 0.00335              | -3.643     | 0.00335              | -3.53      | 0.00335              | -4.8       |
| 0.00341              | -3.939     | 0.00341              | -3.805     | 0.00341              | -5.172     |
| 0.00347              | -4.244     | 0.00347              | -4.088     | 0.00347              | -5.549     |

**Table SI 4a** Average observed rate constants,  $k_{\text{obs.}(1^{\text{st}})}$ ,  $\text{s}^{-1}$ , for the simultaneous displacement of the aqua ligands in **pPh** by thiourea nucleophiles,  $\text{pH} = 2.0$ ,  $T = 298 \text{ K}$ ,  $I = 0.02 \text{ M}$   $\{0.01 \text{ M CF}_3\text{SO}_3\text{H}$ , adjusted with  $\text{Li}(\text{SO}_3\text{CF}_3)\}$ .

| [tu], M   | $k_{\text{obs } 1}, \text{s}^{-1}$ | [dmtu], M | $k_{\text{obs } 1}, \text{s}^{-1}$ | [tmtu], M | $k_{\text{obs } 1}, \text{s}^{-1}$ |
|-----------|------------------------------------|-----------|------------------------------------|-----------|------------------------------------|
| 5.3366E-4 | 0.4904                             | 5.3366E-4 | 0.397                              | 5.3366E-4 | 0.1197                             |
| 0.00107   | 0.9981                             | 0.00107   | 0.7997                             | 0.00107   | 0.2355                             |
| 0.0016    | 1.495                              | 0.0016    | 1.183                              | 0.0016    | 0.3578                             |
| 0.00213   | 2.03                               | 0.00213   | 1.561                              | 0.00213   | 0.4847                             |
| 0.00267   | 2.498                              | 0.00267   | 1.988                              | 0.00267   | 0.588                              |

**Table SI 4b** Average observed rate constants,  $k_{\text{obs.}(2^{\text{nd}})}, \text{s}^{-1}$ , for the dechelation of the pyridyl units in **pPh** by thiourea nucleophiles, pH = 2.0, T = 298 K, I = 0.02 M {0.01 M  $\text{CF}_3\text{SO}_3\text{H}$ , adjusted with  $\text{Li}(\text{SO}_3\text{CF}_3)$ }.

| [tu], M   | $k_{\text{obs.} 2}, \text{s}^{-1}$ | [dmtu], M | $k_{\text{obs.} 2}, \text{s}^{-1}$ | [tmtu], M | $k_{\text{obs.} 2}, \text{s}^{-1}$ |
|-----------|------------------------------------|-----------|------------------------------------|-----------|------------------------------------|
| 5.3366E-4 | 0.00307                            | 5.3366E-4 | 0.00336                            | 5.3366E-4 | 0.00185                            |
| 0.00107   | 0.0061                             | 0.00107   | 0.00674                            | 0.00107   | 0.0037                             |
| 0.0016    | 0.01013                            | 0.0016    | 0.01016                            | 0.0016    | 0.00524                            |
| 0.00213   | 0.01305                            | 0.00213   | 0.01354                            | 0.00213   | 0.00705                            |
| 0.00267   | 0.01698                            | 0.00267   | 0.01684                            | 0.00267   | 0.00888                            |

**Table SI 4c** Temperature dependence of  $k_{2(1^{\text{st}})}, \text{M}^{-1} \text{s}^{-1}$ , for the simultaneous displacement of the aqua ligands in **pPh** by thiourea nucleophiles, pH = 2.0, I = 0.02 M {0.01 M  $\text{CF}_3\text{SO}_3\text{H}$ , adjusted with  $\text{Li}(\text{SO}_3\text{CF}_3)$ }.

| 1/T, K <sup>-1</sup> | ln(k/T) | 1/T, K <sup>-1</sup> | ln(k/T) | 1/T, K <sup>-1</sup> | ln(k/T) |
|----------------------|---------|----------------------|---------|----------------------|---------|
| 0.00325              | 1.379   | 0.00325              | 1.558   | 0.00325              | 0.207   |
| 0.0033               | 1.131   | 0.0033               | 1.354   | 0.0033               | -0.049  |
| 0.00335              | 0.927   | 0.00335              | 1.146   | 0.00335              | -0.319  |
| 0.00341              | 0.655   | 0.00341              | 0.9108  | 0.00341              | -0.6345 |
| 0.00347              | 0.315   | 0.00347              | 0.7042  | 0.00347              | -0.8789 |

**Table SI 4d** Temperature dependence of  $k_{2(2^{\text{nd}})}, \text{M}^{-1} \text{s}^{-1}$ , for the dechelation of the pyridyl units in **pPh** by thiourea nucleophiles, pH = 2.0, I = 0.02 M {0.01 M  $\text{CF}_3\text{SO}_3\text{H}$ , adjusted with  $\text{Li}(\text{SO}_3\text{CF}_3)$ }.

| 1/T, K <sup>-1</sup> | ln(k/T) | 1/T, K <sup>-1</sup> | ln(k/T) | 1/T, K <sup>-1</sup> | ln(k/T) |
|----------------------|---------|----------------------|---------|----------------------|---------|
| 0.00325              | -3.253  | 0.00325              | -3.258  | 0.00325              | -3.511  |
| 0.0033               | -3.546  | 0.0033               | -3.494  | 0.0033               | -3.859  |
| 0.00335              | -3.852  | 0.00335              | -3.781  | 0.00335              | -4.195  |
| 0.00341              | -4.148  | 0.00341              | -4.057  | 0.00341              | -4.601  |
| 0.00347              | -4.465  | 0.00347              | -4.386  | 0.00347              | -5.018  |
